# Supplementary material for: Nuclear Importation of Mariner Transposases among Eukaryotes: Motif Requirements and Homo-Protein Interactions
Source: PubMed Central journal article supplement (PMC3158080; doi:10.1371/journal.pone.0023693), 2011-08-18

## **Nuclear Importation of *Mariner* Transposases among Eukaryotes: Motif Requirements, and Homo-Protein Interactions**

Marie-Véronique Demattei, Sabah Hedhili, Ludivine Sinzelle, Christophe Bressac, Sophie Casteret, Nathalie Moiré, Jeanne Cambefort, Xavier Thomas, Nicolas Pollet, Pascal Gantet and Yves Bigot

### **Supporting Information 2 :**

GFP fluorescence patterns of HIMAR1-GFP and MCMAR-GFP in mammal, amphibian, insect and plant cells

#### **Figure legends -**

**a. Analysis of the GFP-fluorescence of HIMAR1-FL GFP fusion** in human HeLa cells, *X. tropicalis* cells, insect cells, and onion epidermal cells. The left panels show GFP fluorescence, the middle panels show the nuclear genomic DNA staining by DAPI, the right panels correspond to merge pictures.

**b. Analysis of the GFP-fluorescence of MCMAR1-FL GFP fusion** in human HeLa cells, *X. tropicalis* cells, insect cells, and onion epidermal cells. The left panels show GFP fluorescence, the middle panels show the nuclear genomic DNA staining by DAPI, the right panels correspond to merge pictures.

### a. HIMAR1-GFP fusion

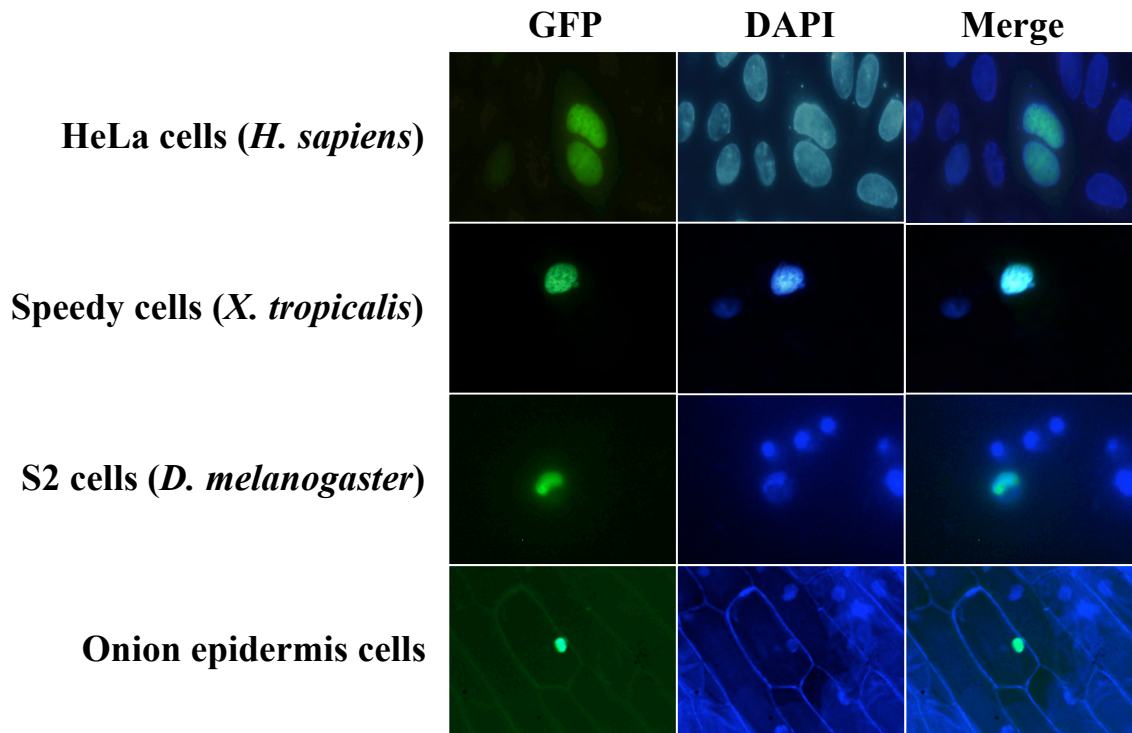

### b. MCMAR1-GFP fusion

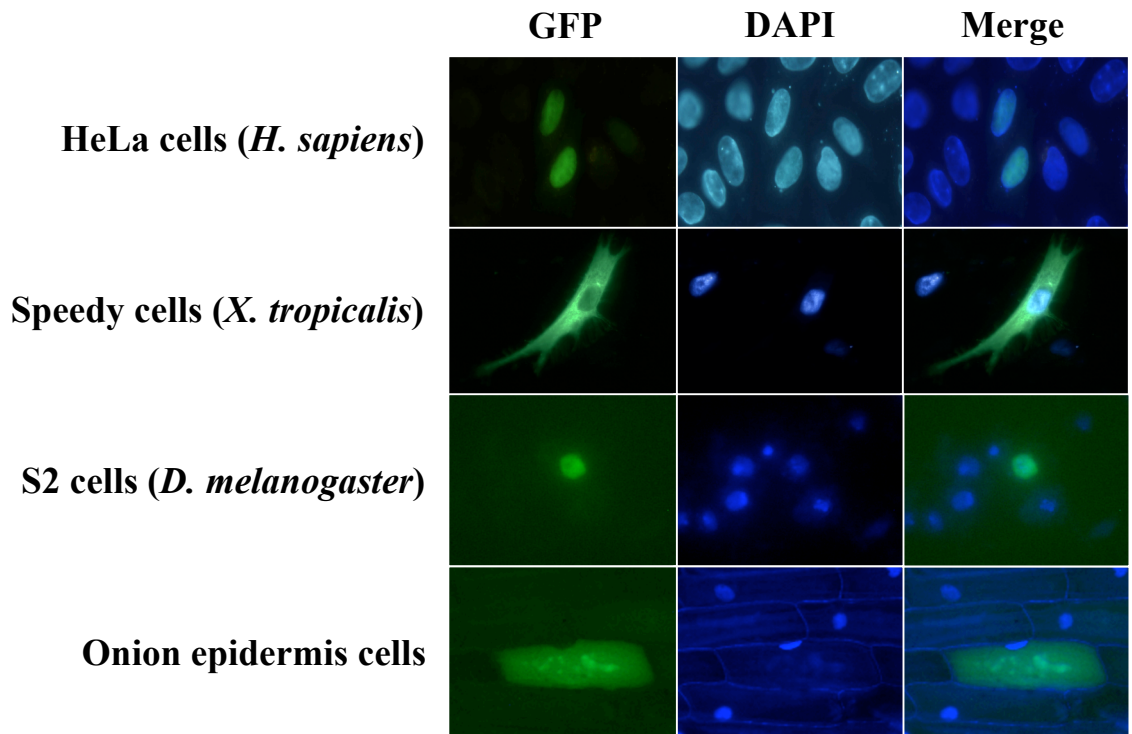

Supplement: pone.0023693.s002.pdf [file pone.0023693.s002.pdf]
