# Supplementary material for: Nuclear Importation of Mariner Transposases among Eukaryotes: Motif Requirements and Homo-Protein Interactions
Source: PubMed Central journal article supplement (PMC3158080; doi:10.1371/journal.pone.0023693), 2011-08-18

## **Nuclear Importation of *Mariner* Transposases among Eukaryotes: Motif Requirements, and Homo-Protein Interactions**

Marie-Véronique Demattei, Sabah Hedhili, Ludivine Sinzelle, Christophe Bressac, Sophie Casteret, Nathalie Moiré, Jeanne Cambefort, Xavier Thomas, Nicolas Pollet, Pascal Gantet and Yves Bigot

### **Supporting Information 3 :**

GFP fluorescence patterns in plant and insect cells transfected with MCMAR  $\Delta$ 3-GFP

**Figure legend** - Features of the different fluorescence patterns observed in onion epidermal cells (a to c) and in *Drosophila* S2 cells (d to f). Fluorescence patterns a and d were obtained when cells had been transfected with GFP alone, which diffuses into both compartments (DBC) due to the lack of any specific cellular addressing to the nucleus or cytoplasm. Fluorescence patterns b and e were obtained when cells had been transfected with a GFP fusion that is specifically addressed to the nucleus, due the presence of an SV40 NLS fused at the C-terminal end of the GFP. Fluorescence patterns c and f were obtained when cells expressed an MCMAR1  $\Delta$ 3-GFP.

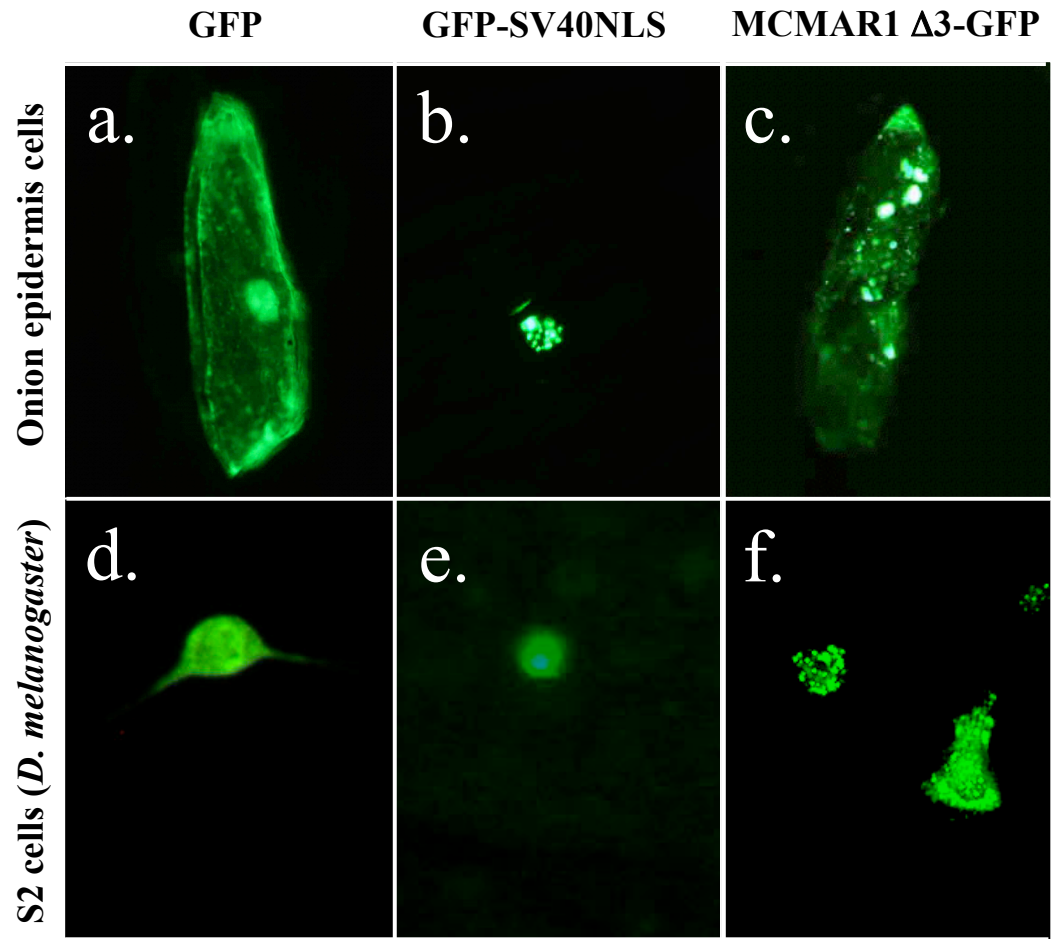

Supplement: pone.0023693.s003.pdf [file pone.0023693.s003.pdf]
