# Supplementary material for: Nuclear Importation of Mariner Transposases among Eukaryotes: Motif Requirements and Homo-Protein Interactions
Source: PubMed Central journal article supplement (PMC3158080; doi:10.1371/journal.pone.0023693), 2011-08-18
Supplement: pone.0023693.s006.pdf [file pone.0023693.s006.pdf]

# Nuclear Importation of *Mariner* Transposases among Eukaryotes: Motif Requirements, and Homo-Protein Interactions

Marie-Véronique Demattei, Sabah Hedhili, Ludivine Sinzelle, Christophe Bressac, Sophie Casteret, Nathalie Moiré, Jeanne Cambefort, Xavier Thomas, Nicolas Pollet, Pascal Gantet  
and Yves Bigot

## Supporting Information 6 : Oligonucleotides used in the studies

| Primer name      | Nucleotide sequence                                                                | Positions in<br>Tpase<br>sequence* |
|------------------|------------------------------------------------------------------------------------|------------------------------------|
| <i>Mos1</i>      |                                                                                    |                                    |
| Mos1-5'NcoI      | 5' -GCGTCACCATGGCGAGTTTCGTGCCG-3'                                                  | 1-6                                |
| Mos1-3'SpeI      | 5' -GACTAGTTTCAAAGTATTTGCCGTGCT-3'                                                 | 345-339                            |
| Mos1-3'Δ1 SpeI : | 5' -GACTAGTAGCATCGTCTTCATCCAATAA-3'                                                | 86-79                              |
| Mos1-3'Δ2 SpeI:  | 5' -GACTAGTTCAGGATCAACGTATGACT-3'                                                  | 175-169                            |
| Mos1-3'Δ3 NcoII  | 5' -CCCATGGGACAACCGTCCACATCG-3'                                                    | 175-180                            |
| Mos1-Δ4 NcoI     | 5' -GCGTCACCATGGAAACGCAAAAACAACACTCG-3'                                            | 86-93                              |
| Mos1-Δ5 NcoI     | 5' -GCGTCACCGAAGTAAGTCAACAAGCAGTTT-3'                                              | 97-104                             |
| Mos1-Δ6 NcoI     | 5' -GCGTCACCGTGATCTTCCTGCACGACAATG-3'                                              | 244-251                            |
| Mos1-NLS1up      | 5' -CATGGAACGCTTCAAAGTGGTGATTTTGACGTGACGACAAAAGA<br>GCACGGAAAACCGCCAAAAGGA-3'      | 52-71                              |
| Mos1-NLS1dw      | 5' -CTAGTCCTTTTTGGCGGTTTTCCGTGCTCTTTGTGTCGTCGACGTCA<br>AAATCACCACCTTTTGAAGCGTTC-3' | 52-71                              |
| Mos1-NLS2up      | 5' -CATGGGAAAACCGCCAAAAGGTACGA-3'                                                  | 66-71                              |
| Mos1-NLS2dw      | 5' -CTAGCGTACCTTTTTGGCGGTTTTCC-3'                                                  | 66-71                              |
| Mos1-NLS3up      | 5' -CATGGAGAGGCGCAAAAACACATGCGAAATTTTGCTTTCACGATA<br>CAAAGGA-3'                    | 131-146                            |
| Mos1-NLS3dw      | 5' -CTAGTCCTTTTGTATCGTGAAAGCAAAATTTTCGCATGTGTTTTTG<br>CGCCTCTC-3'                  | 131-146                            |
| Mos1-NLS4up      | 5' -CATGCCTAAACGTAAAAAGTCATACG-3'                                                  | 164-169                            |
| Mos1-NLS4dw      | 5' -CTAGCGTATGACTTTTTTACGTTTAGG-3'                                                 | 164-169                            |
| <i>Himar1</i>    |                                                                                    |                                    |
| Himar1-5'NcoI    | 5' -GCCATGGAAAAAAGGAATTTTCG-3'                                                     | 1-7                                |
| Himar1-3'SpeI    | 5' -GACTAGTTTCAACATAGTTCCCTTCAAG-3'                                                | 348-342                            |
| Himar1-3'Δ1SpeI  | 5' -GACTAGTATTCAAATCATTGTGGAT-3'                                                   | 82-76                              |
| Himar1-3'Δ2SpeI  | 5' -GACTAGTGGTCGCTGTCCACTCAGCCGA-3'                                                | 179-173                            |
| Himar1-3'Δ3NcoI  | 5' -CCCATGGCTGAGTGGACAGCGACC-3'                                                    | 174-179                            |
| <i>Mcmar1</i>    |                                                                                    |                                    |
| Mcmar1-5'NcoI    | 5' -GCCATGGATGAAAAAAAAAGAATAAG-3'                                                  | 1-8                                |
| Mcmar1-3'SpeI    | 5' -GACTAGTTTCATAGAAATAATTTCCATT-3'                                                | 340-334                            |
| Mcmar1-3'Δ1SpeI  | 5' -GACTAGTTGCGGGATTCTCATTAATTGC-3'                                                | 82-76                              |
| Mcmar1-3'Δ2SpeI  | 5' -GACTAGTCCCAACTGCAAGCCATTGCTT-3'                                                | 171-165                            |
| Mcmar1-3'Δ3NcoI  | 5' -CCCATGCAAGATGCTAATGCAA-3'                                                      | 172-176                            |

\* in the alignment of Fig. 1
